# Supplementary material for: The baubellum is more developmentally and evolutionarily labile than the baculum
Source: PubMed Central journal article supplement (PMC5773289; doi:10.1002/ece3.3634), 2017-12-20

Supplementary Figure 1

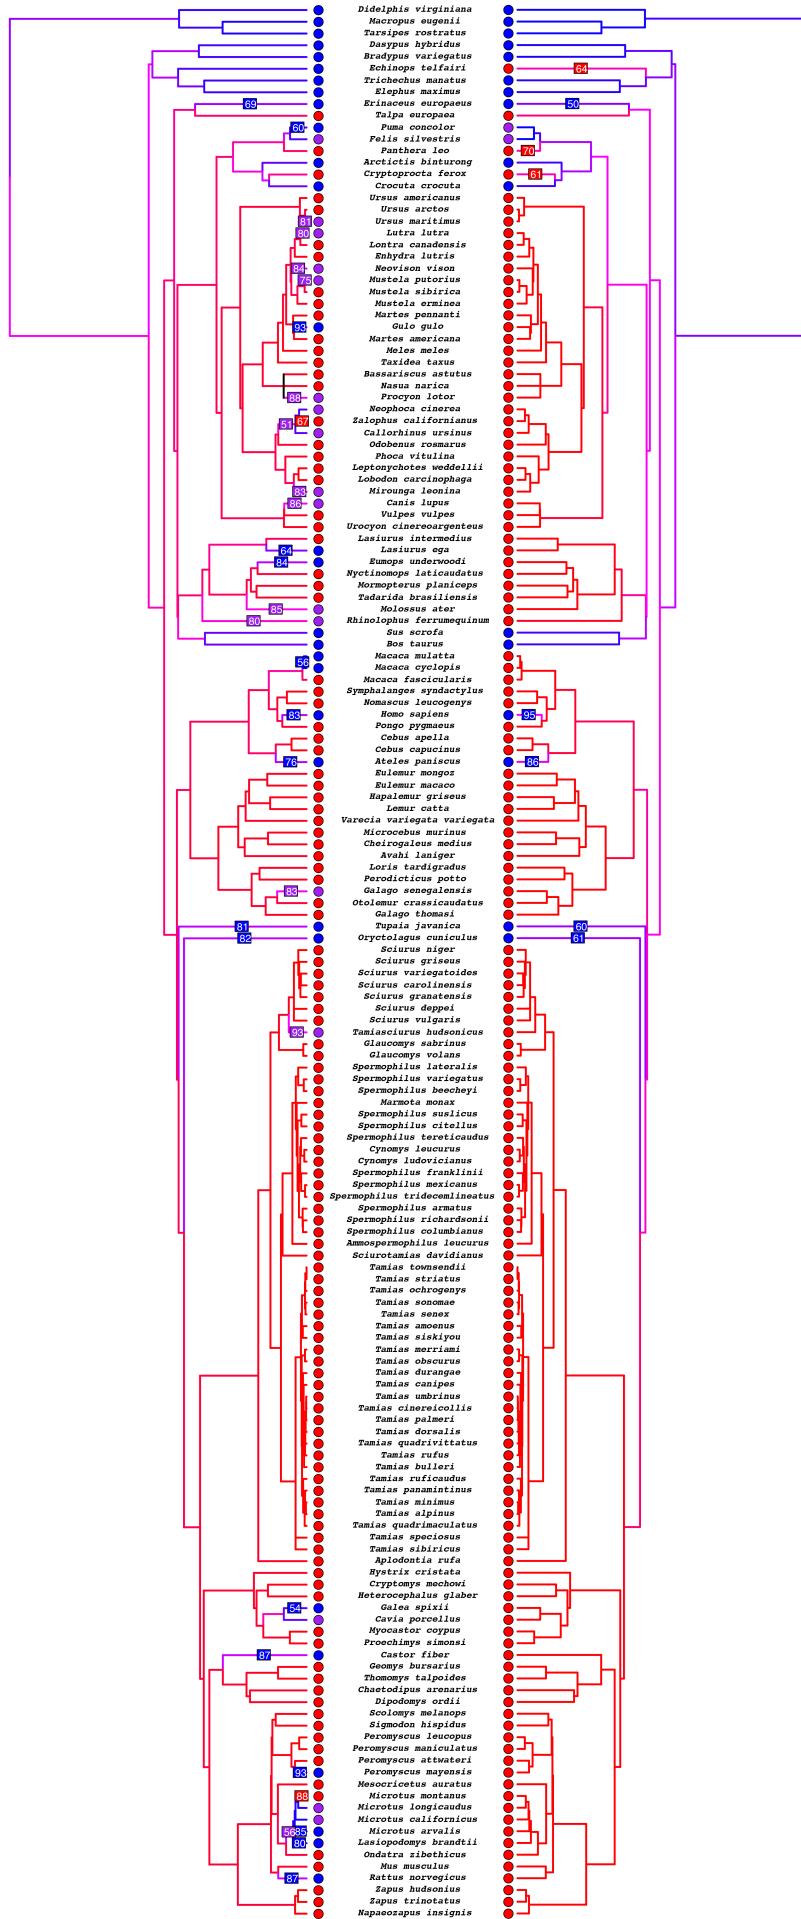

Supplement: ECE3-8-1073-s001.pdf [file ECE3-8-1073-s001.pdf]
